# Supplementary material
Source: Springer Nature journal article supplement (https://www.springermedizin.de/resource/supplementary/12887_2012_809_MOESM3_ESM.pdf/9476288)

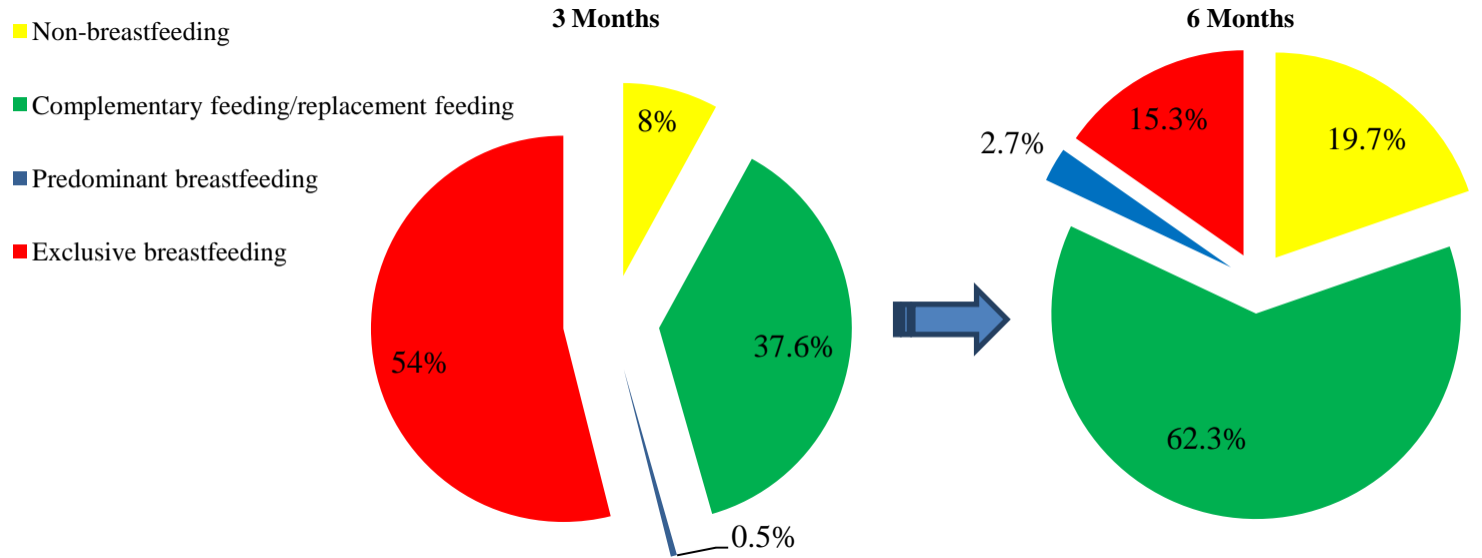

Supplement: MOESM3 [file 9476288]
